# Supplementary material for: Soil Organic Carbon Content Prediction Using Soil-Reflected Spectra: A Comparison of Two Regression Methods
Source: MDPI journal article supplement (doi:10.3390/rs13234752), 2021-11-24
Supplement: s1 [file s1]

# SUPPLEMENTARY MATERIAL

Table S1. Validation results of the PCR models for estimating SOC using the 350-2500 nm spectrum.

| PCR   | Untransformed Full Spectrum                                                                                                                                                                                                                                                                                                                                                                                                                                                                                                                                                      | First Derivative Full Spectrum                                                                                                                                                                                                                                                                | Smoothed Full Spectrum                                                                                                                                                                                                                                                                     |
|-------|----------------------------------------------------------------------------------------------------------------------------------------------------------------------------------------------------------------------------------------------------------------------------------------------------------------------------------------------------------------------------------------------------------------------------------------------------------------------------------------------------------------------------------------------------------------------------------|-----------------------------------------------------------------------------------------------------------------------------------------------------------------------------------------------------------------------------------------------------------------------------------------------|--------------------------------------------------------------------------------------------------------------------------------------------------------------------------------------------------------------------------------------------------------------------------------------------|
| A1    | <p><b>A1 - Untransformed spectrum (11 factors)</b></p> <p>Predicted SOC (normalised)</p> <p>Measured SOC (normalised)</p> <p>PCR prediction<br/>Linear (PCR prediction)</p> <p><math>R^2 = 0.86</math><br/><math>R^2 \text{ adj.} = 0.84</math><br/>RMSE = 15.2%<br/>RPD = 2.03</p>                                                                                                                                                                                                                                                                                              | <p><b>A1 - 1<sup>st</sup> derivative (17 factors)</b></p> <p>Predicted SOC (normalised)</p> <p>Measured SOC (normalised)</p> <p>PCR prediction<br/>Linear (PCR prediction)</p> <p><math>R^2 = 0.91</math><br/><math>R^2 \text{ adj.} = 0.90</math><br/>RMSE = 17.6%<br/>RPD = 1.76</p>        | <p><b>A1 - Smoothed reflectance (11 factors)</b></p> <p>Predicted SOC (normalised)</p> <p>Measured SOC (normalised)</p> <p>PCR prediction<br/>Linear (PCR prediction)</p> <p><math>R^2 = 0.86</math><br/><math>R^2 \text{ adj.} = 0.84</math><br/>RMSE = 15.0%<br/>RPD = 2.06</p>          |
| A2    | <p><b>A2 - Untransformed spectrum (19 factors)</b></p> <p>Predicted SOC (normalised)</p> <p>Measured SOC (normalised)</p> <p>PCR prediction<br/>Linear (PCR prediction)</p> <p><math>R^2 = 0.40</math><br/><math>R^2 \text{ adj.} = 0.34</math><br/>RMSE = 21.7%<br/>RPD = 1.30</p> <p><b>A1 &amp; A2 - Untransformed spectrum (26 factors)</b></p> <p>Predicted SOC (normalised)</p> <p>Measured SOC (normalised)</p> <p>PCR prediction<br/>Linear (PCR prediction)</p> <p><math>R^2 = 0.77</math><br/><math>R^2 \text{ adj.} = 0.76</math><br/>RMSE = 10.6%<br/>RPD = 2.11</p> | <p><b>A2 - 1<sup>st</sup> derivative (5 factors)</b></p> <p>Predicted SOC (normalised)</p> <p>Measured SOC (normalised)</p> <p>PCR prediction<br/>Linear (PCR prediction)</p> <p><math>R^2 = 0.13</math><br/><math>R^2 \text{ adj.} = 0.03</math><br/>RMSE = 25.7%<br/>RPD = 1.10</p>         | <p><b>A2 - Smoothed reflectance (20 factors)</b></p> <p>Predicted SOC (normalised)</p> <p>Measured SOC (normalised)</p> <p>PCR prediction<br/>Linear (PCR prediction)</p> <p><math>R^2 = 0.39</math><br/><math>R^2 \text{ adj.} = 0.32</math><br/>RMSE = 22.1%<br/>RPD = 1.28</p>          |
| A1&A2 | <p><b>A1 &amp; A2 - Untransformed spectrum (26 factors)</b></p> <p>Predicted SOC (normalised)</p> <p>Measured SOC (normalised)</p> <p>PCR prediction<br/>Linear (PCR prediction)</p> <p><math>R^2 = 0.77</math><br/><math>R^2 \text{ adj.} = 0.76</math><br/>RMSE = 10.6%<br/>RPD = 2.11</p>                                                                                                                                                                                                                                                                                     | <p><b>A1 &amp; A2 - 1<sup>st</sup> derivative (1 factor)</b></p> <p>Predicted SOC (normalised)</p> <p>Measured SOC (normalised)</p> <p>PCR prediction<br/>Linear (PCR prediction)</p> <p><math>R^2 = 0.17</math><br/><math>R^2 \text{ adj.} = 0.13</math><br/>RMSE = 29.2%<br/>RPD = 0.77</p> | <p><b>A1 &amp; A2 - Smoothed reflectance (20 factors)</b></p> <p>Predicted SOC (normalised)</p> <p>Measured SOC (normalised)</p> <p>PCR prediction<br/>Linear (PCR prediction)</p> <p><math>R^2 = 0.73</math><br/><math>R^2 \text{ adj.} = 0.72</math><br/>RMSE = 11.6%<br/>RPD = 1.93</p> |

**Table S2. Validation results of the PLSR models for estimating SOC using the 350-2500 nm spectrum**

| PLSR  | Untransformed Full Spectrum                                                                                                                                                                                           | First Derivative Full Spectrum                                                                                                                                                                                         | Smoothed Full Spectrum                                                                                                                                                                                              |
|-------|-----------------------------------------------------------------------------------------------------------------------------------------------------------------------------------------------------------------------|------------------------------------------------------------------------------------------------------------------------------------------------------------------------------------------------------------------------|---------------------------------------------------------------------------------------------------------------------------------------------------------------------------------------------------------------------|
| A1    | <p><b>A1 - Untransformed spectrum (8 factors)</b></p> <p> <math>R^2 = 0.81</math><br/> <math>R^2 \text{ adj.} = 0.78</math><br/> <math>\text{RMSE} = 15.0\%</math><br/> <math>\text{RPD} = 2.07</math> </p>           | <p><b>A1 - 1<sup>st</sup> derivative (6 factors)</b></p> <p> <math>R^2 = 0.88</math><br/> <math>R^2 \text{ adj.} = 0.86</math><br/> <math>\text{RMSE} = 16.0\%</math><br/> <math>\text{RPD} = 1.93</math> </p>         | <p><b>A1 - Smoothed reflectance (7 factors)</b></p> <p> <math>R^2 = 0.84</math><br/> <math>R^2 \text{ adj.} = 0.81</math><br/> <math>\text{RMSE} = 15.1\%</math><br/> <math>\text{RPD} = 2.04</math> </p>           |
| A2    | <p><b>A2 - Untransformed spectrum (11 factors)</b></p> <p> <math>R^2 = 0.44</math><br/> <math>R^2 \text{ adj.} = 0.38</math><br/> <math>\text{RMSE} = 22.3\%</math><br/> <math>\text{RPD} = 1.27</math> </p>          | <p><b>A2 - 1<sup>st</sup> derivative (1 factor)</b></p> <p> <math>R^2 = 0.07</math><br/> <math>R^2 \text{ adj.} = 0.02</math><br/> <math>\text{RMSE} = 29.2\%</math><br/> <math>\text{RPD} = 0.97</math> </p>          | <p><b>A2 - Smoothed reflectance (11 factors)</b></p> <p> <math>R^2 = 0.47</math><br/> <math>R^2 \text{ adj.} = 0.41</math><br/> <math>\text{RMSE} = 21.8\%</math><br/> <math>\text{RPD} = 1.29</math> </p>          |
| A1&A2 | <p><b>A1 &amp; A2 - Untransformed spectrum (12 factors)</b></p> <p> <math>R^2 = 0.73</math><br/> <math>R^2 \text{ adj.} = 0.71</math><br/> <math>\text{RMSE} = 11.9\%</math><br/> <math>\text{RPD} = 1.88</math> </p> | <p><b>A1 &amp; A2 - 1<sup>st</sup> derivative (1 factor)</b></p> <p> <math>R^2 = 0.19</math><br/> <math>R^2 \text{ adj.} = 0.14</math><br/> <math>\text{RMSE} = 30.2\%</math><br/> <math>\text{RPD} = 0.74</math> </p> | <p><b>A1 &amp; A2 - Smoothed reflectance (20 factors)</b></p> <p> <math>R^2 = 0.76</math><br/> <math>R^2 \text{ adj.} = 0.75</math><br/> <math>\text{RMSE} = 11.2\%</math><br/> <math>\text{RPD} = 1.99</math> </p> |

Table S3. Validation results of the PCR models for SOC prediction after selecting the spectral bands.

| PCR   | Untransformed Selected Bands                                                                                                                 | First Derivative Selected Bands                                                                                                                   | Smoothed Selected Bands                                                                                                                       |
|-------|----------------------------------------------------------------------------------------------------------------------------------------------|---------------------------------------------------------------------------------------------------------------------------------------------------|-----------------------------------------------------------------------------------------------------------------------------------------------|
| A1    | <b>A1 - Untransformed spectrum (10 factors)</b><br>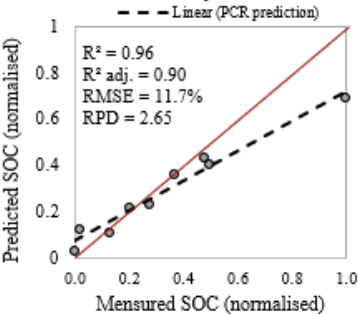         | <b>A1 - 1<sup>st</sup> derivative (10 factors)</b><br>          | <b>A1 - Smoothed reflectance (9 factors)</b><br>           |
| A2    | <b>A2 - Untransformed spectrum (5 factors)</b><br>         | <b>A2 - 1<sup>st</sup> derivative (10 factors)</b><br>         | <b>A2 - Smoothed reflectance (4 factors)</b><br>          |
| A1&A2 | <b>A1&amp;A2 - Untransformed spectrum (6 factors)</b><br> | <b>A1&amp;A2 - 1<sup>st</sup> derivative (11 factors)</b><br> | <b>A1&amp;A2 - Smoothed reflectance (13 factors)</b><br> |

**Table S4.** Validation results of the PLSR models for SOC prediction after selecting the spectral bands.

| PLSR  | Untransformed Selected Bands                                                                                                                                                                                       | First Derivative Selected Bands                                                                                                                                                                                      | Smoothed Selected Bands                                                                                                                                                                                         |
|-------|--------------------------------------------------------------------------------------------------------------------------------------------------------------------------------------------------------------------|----------------------------------------------------------------------------------------------------------------------------------------------------------------------------------------------------------------------|-----------------------------------------------------------------------------------------------------------------------------------------------------------------------------------------------------------------|
| A1    | <p><b>A1 - Untransformed spectrum (9 factors)</b></p> <p> <math>R^2 = 0.95</math><br/> <math>R^2 \text{ adj.} = 0.95</math><br/> <math>\text{RMSE} = 14.1\%</math><br/> <math>\text{RPD} = 2.19</math> </p>        | <p><b>A1 - 1<sup>st</sup> derivative (9 factors)</b></p> <p> <math>R^2 = 0.90</math><br/> <math>R^2 \text{ adj.} = 0.89</math><br/> <math>\text{RMSE} = 10.9\%</math><br/> <math>\text{RPD} = 2.85</math> </p>       | <p><b>A1 - Smoothed reflectance (8 factors)</b></p> <p> <math>R^2 = 0.92</math><br/> <math>R^2 \text{ adj.} = 0.91</math><br/> <math>\text{RMSE} = 8.7\%</math><br/> <math>\text{RPD} = 3.56</math> </p>        |
| A2    | <p><b>A2 - Untransformed spectrum (5 factors)</b></p> <p> <math>R^2 = 0.61</math><br/> <math>R^2 \text{ adj.} = 0.57</math><br/> <math>\text{RMSE} = 18.2\%</math><br/> <math>\text{RPD} = 1.56</math> </p>        | <p><b>A2 - 1<sup>st</sup> derivative (7 factors)</b></p> <p> <math>R^2 = 0.74</math><br/> <math>R^2 \text{ adj.} = 0.71</math><br/> <math>\text{RMSE} = 15.9\%</math><br/> <math>\text{RPD} = 1.78</math> </p>       | <p><b>A2 - Smoothed reflectance (4 factors)</b></p> <p> <math>R^2 = 0.61</math><br/> <math>R^2 \text{ adj.} = 0.56</math><br/> <math>\text{RMSE} = 20.2\%</math><br/> <math>\text{RPD} = 1.40</math> </p>       |
| A1&A2 | <p><b>A1&amp;A2 - Untransformed spectrum (6 factors)</b></p> <p> <math>R^2 = 0.71</math><br/> <math>R^2 \text{ adj.} = 0.70</math><br/> <math>\text{RMSE} = 11.8\%</math><br/> <math>\text{RPD} = 1.90</math> </p> | <p><b>A1&amp;A2 - 1<sup>st</sup> derivative (7 factors)</b></p> <p> <math>R^2 = 0.86</math><br/> <math>R^2 \text{ adj.} = 0.85</math><br/> <math>\text{RMSE} = 9.7\%</math><br/> <math>\text{RPD} = 2.30</math> </p> | <p><b>A1&amp;A2 - Smoothed reflectance (9 factors)</b></p> <p> <math>R^2 = 0.88</math><br/> <math>R^2 \text{ adj.} = 0.87</math><br/> <math>\text{RMSE} = 7.9\%</math><br/> <math>\text{RPD} = 2.85</math> </p> |
